# Supplementary material for: Immunosuppressive Microenvironment and Efficacy of PD-1 Inhibitors in Relapsed/Refractory Classic Hodgkin Lymphoma: Checkpoint Molecules Landscape and Macrophage Populations
Source: MDPI journal article supplement (doi:10.3390/cancers13225676), 2021-11-12
Supplement: s1 [file s1]

# Immunosuppressive Microenvironment and Efficacy of PD-1 Inhibitors in Relapsed/Refractory Classic Hodgkin Lymphoma: Checkpoint Molecules Landscape and Macrophage Populations

Artem Gusak, Liudmila Fedorova, Kirill Lepik, Nikita Volkov, Marina Popova, Ivan Moiseev, Natalia Mikhailova, Vadim Baykov and Alexander Kulagin

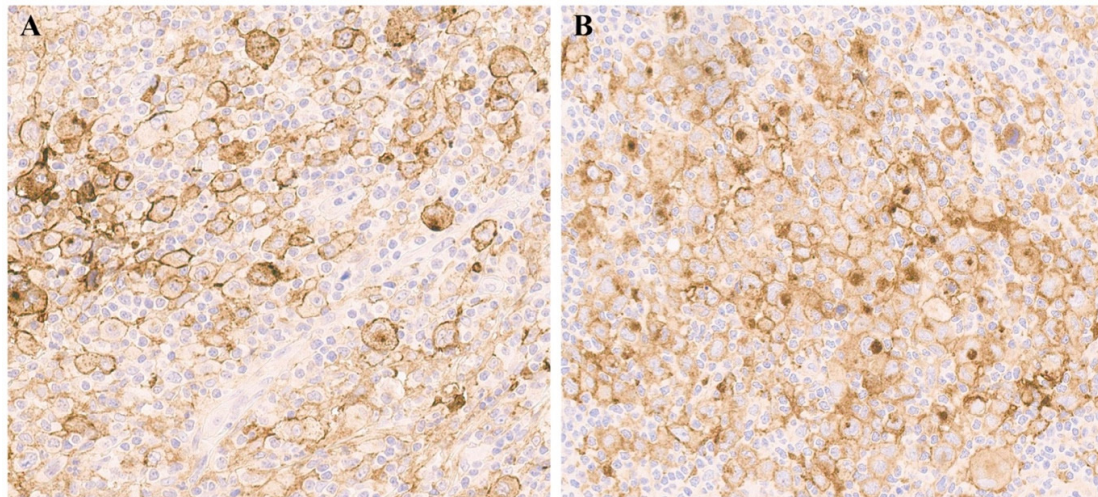

**Figure S1.** PD-L1 expression in representative cases with different progression-free survival (PFS), primary biopsies: (A) PFS of 61 months, (B) PFS of 2.9 months. [Original magnification: (A,B)  $\times 400$ ].

|        | PD-1    | LAG-3                    | CTLA-4                   | TIM-3                     | TIGIT                    | CD68                      | CD163                     | M2                       |
|--------|---------|--------------------------|--------------------------|---------------------------|--------------------------|---------------------------|---------------------------|--------------------------|
| M2     |         |                          |                          |                           |                          |                           |                           | $r = 1$                  |
| CD163  |         |                          |                          |                           |                          |                           | $r = 1$                   | $r = 0.2$<br>$p = 0.17$  |
| CD68   |         |                          |                          |                           |                          | $r = 1$                   | $r = 0.62$<br>$p < 0.01$  | $r = 0.14$<br>$p = 0.47$ |
| TIGIT  |         |                          |                          |                           | $r = 1$                  | $r = 0.16$<br>$p = 0.4$   | $r = 0.25$<br>$p = 0.19$  | $r = 0.01$<br>$p = 0.98$ |
| TIM-3  |         |                          |                          | $r = 1$                   | $r = 0.28$<br>$p = 0.14$ | $r = 0.22$<br>$p = 0.21$  | $r = 0.39$<br>$p < 0.01$  | $r = 0.05$<br>$p = 0.73$ |
| CTLA-4 |         |                          | $r = 1$                  | $r = -0.21$<br>$p = 0.12$ | $r = -0.07$<br>$p = 0.7$ | $r = -0.17$<br>$p = 0.35$ | $r = -0.49$<br>$p < 0.01$ | $r = -0.18$<br>$p = 0.2$ |
| LAG-3  |         | $r = 1$                  | $r = 0.1$<br>$p = 0.44$  | $r = 0.16$<br>$p = 0.23$  | $r = 0.01$<br>$p = 0.97$ | $r = 0.16$<br>$p = 0.38$  | $r = 0.04$<br>$p = 0.75$  | $r = 0.01$<br>$p = 0.93$ |
| PD-1   | $r = 1$ | $r = 0.31$<br>$p = 0.02$ | $r = 0.23$<br>$p = 0.08$ | $r = 0.02$<br>$p = 0.87$  | $r = 0.3$<br>$p = 0.11$  | $r = 0.05$<br>$p = 0.77$  | $r = -0.08$<br>$p = 0.53$ | $r = 0.08$<br>$p = 0.57$ |

**Figure S2.** Correlation between assessed markers in primary biopsies. Abbreviations: M2–M2-macrophages,  $r$ –correlation coefficient.

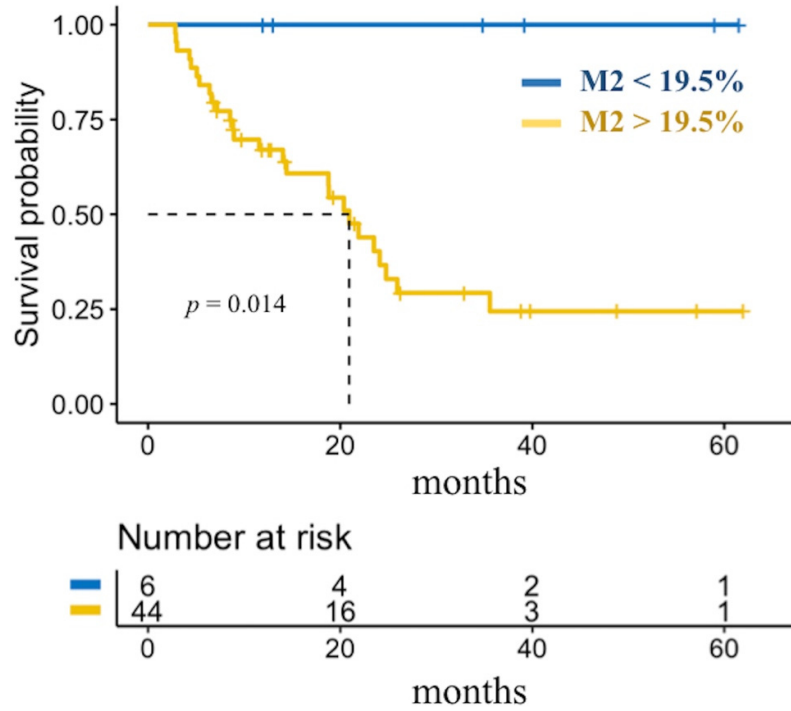

**Figure S3.** Progression-free survival depending on M2 level in primary biopsies. Abbreviations: M2–M2-macrophages. The dotted line indicates median of survival.

**Table S1.** Optimal immunohistochemical protocol parameters.

| Immunohistochemistry of Single Staining |                                      |       |                   |         |           |           |          |              |        |  |
|-----------------------------------------|--------------------------------------|-------|-------------------|---------|-----------|-----------|----------|--------------|--------|--|
| Antibody                                | Clone                                | C     | AR, T, Min, ER1/2 | PB, Min | PrAb, Min | PP, Min   | Pol, Min | DAB, Min     | H, Min |  |
| CD68                                    | PG-M1, Dako                          | 1:100 | 100°C, 30, ER2    | 5       | 15        | 8         | 8        | 10           | 5      |  |
| CD163                                   | 10D6, Leica                          | 1:400 | 100°C, 30, ER1    | 5       | 15        | 8         | 8        | 10           | 5      |  |
| PD-1                                    | NAT105, ab52587                      | 1:50  | 100°C, 30, ER2    | 5       | 20        | 8         | 8        | 10           | 5      |  |
| LAG-3                                   | EPR20261, ab209236                   | 1:500 | 100°C, 30, ER2    | 5       | 30        | 8         | 8        | 10           | 5      |  |
| TIM-3                                   | EPR22241, ab241332                   | 1:800 | 100°C, 30, ER2    | 5       | 30        | 8         | 8        | 10           | 5      |  |
| TIGIT                                   | BLR047F, ab243903                    | 1:200 | 100°C, 30, ER1    | 5       | 30        | 8         | 8        | 10           | 5      |  |
| CTLA-4                                  | CAL49, ab237712                      | 1:600 | 100°C, 30, ER2    | 5       | 30        | 8         | 8        | 10           | 5      |  |
| Immunohistochemistry of double staining |                                      |       |                   |         |           |           |          |              |        |  |
| Antibody                                | Clone                                | C     | AR, T, Min, ER1/2 | PB, Min | PrAb, Min | mHRP, Min | rAP, Min | DAB/Red, Min | H, Min |  |
| Antibody<br>Cocktail:<br>CD163/c-maf    | 10D6, Leica<br>EPR16484,<br>ab199424 | 1:125 | 100°C, 40, ER2    | 5       | 30        | 8         | 20       | 10/ 5        | 5      |  |

Abbreviations: C–concentration, AR–antigen retrieval, PB–peroxidase block, PrAb–primary antibody, PP–post primary, Pol–polymer, mHRP–mouse horseradish peroxidase, rAP–rabbit alkaline phosphatase, DAB–3,3'-diaminobenzidine, H–hematoxylin.
